# Supplementary material
Source: MDPI journal article supplement (https://www.mdpi.com/2079-6412/14/3/352)
Supplement: s1 [file s1]

# Supporting Information

**Figure S1**

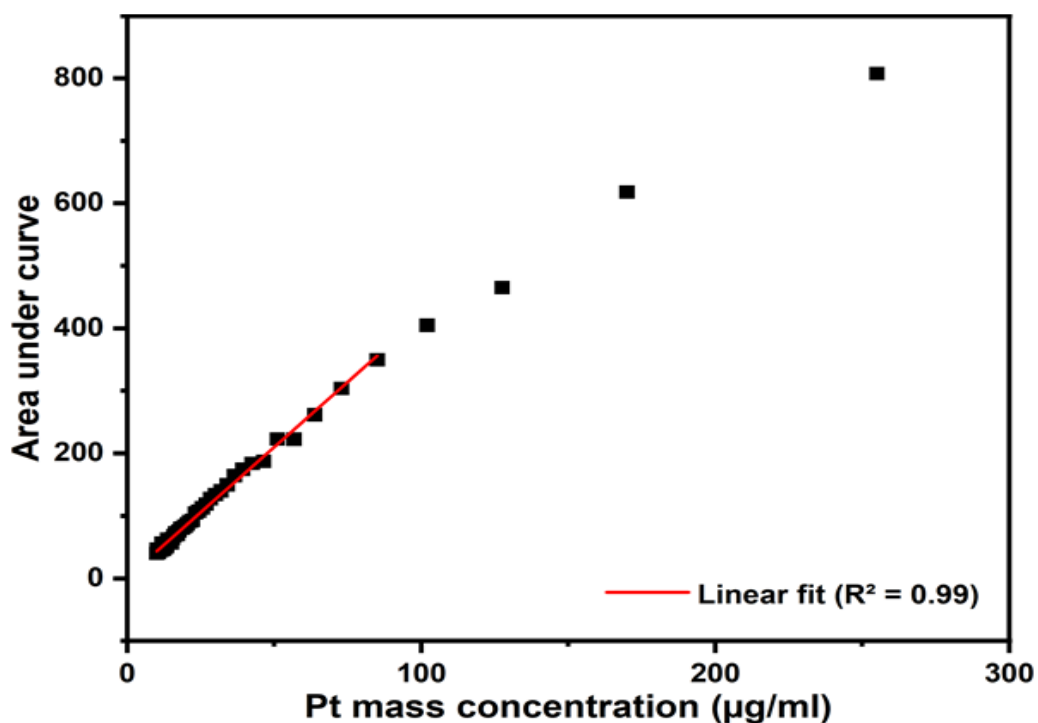

**Figure S1.** Calibration curve based on UV-Vis extinction spectra of the laser- generated, aqueous Pt nano-colloids at different mass concentrations. Area under curve (AUC) values were determined by integration of the absorbance values in a spectral range 190 – 900 nm.
